# Supplementary material for: Loss of transcriptional control over endogenous retroelements during reprogramming to pluripotency
Source: HighWire-hosted journal article supplement (doi:10.1101/gr.172809.114), 2014-05-30
Supplement: Supplemental_Information.docx [file Supplemental_Information.docx]

**SUPPLEMENTARY INFORMATION**

**Loss of transcriptional control over endogenous retroelements during reprogramming to pluripotency**

Marc Friedli, Priscilla Turelli, Adamandia Kapopoulou, Benjamin Rauwel, Nathaly Castro-Díaz, Helen M. Rowe, Gabriela Ecco, Carmen Unzu, Angelo Lombardo, Bastien Mangeat, Barbara E. Wildhaber, Luigi Naldini and Didier Trono

**SupplementaRY FIGURE LEGENDS**

**Fig. S1: Experimental design**

(A) Schematic representation of the OKS reprogramming vector. SIN: Self inactivating LTR. 2A: auto-cleaving 2A peptide. (B) Reprogramming methodology. Somatic cells (mouse MEFs or human CD34) were transduced with OKS on d0 and reprogrammed for approximately 21 days. Whole plates of bulk reprogramming cells were harvested for ERE quantification at reprogramming time points. Individual iPS clones were then picked and expanded. RNA was collected at several time points for transcriptome analyses. Reprogramming MEFs or CD34+ cells and resulting iPS clones are shown. (C) Silencing of the reprogramming transcript (OKS) during human and mouse reprogramming. (D) Nanog expression in mouse iPS clones and ES cells. (E) Human pluripotency genes expression (top) and *NANOG* immunofluorescence (bottom) in iPS clones and human ES. (F) Whole genome cluster analysis for human ESC (H1), human iPSC, and reprogramming time points of CD34+ cells, illustrating similar global transcription between iPSC clones and ES cells. (G) Teratoma formation assay. iPS clones 2,6,14 and 43 were injected subcutaneously in NSG mice and teratoma formation was monitored for 6 weeks. Human ES cells (H1) were used as controls. Dissected iPS teratomas are shown (left) with growth frequency and H&E staining of representative histological sections showing derivatives of all three germ layers (right). Immunohistochemistry was also performed to confirm derivatives of the three germ layers with specific antibodies specific for markers of endoderm (EndoA), mesoderm (Vimentin) and ectoderm (GFAP) (bottom). (H) Karyotypes for all human iPS clones used in transcriptome analyses showing the normal male 46, XY karyotype.

**Fig. S2: qPCR quantification of EREs during human CD34+ cells reprogramming**

qPCR analysis of a second independent human CD34+ reprogramming experiment using cells from a different donor than in Fig. 1. Expression levels are illustrated for parental somatic cells (CD34+, grey squares), reprogramming time points (solid blue line), individual iPSC clones (orange squares), and ES cells (red squares).

**Fig. S3: ERE controllers expression during human CD34+ cells reprogramming**

(A) Fold induction of ERE controllers during reprogramming relative to levels in CD34+ parental cells. Green line indicates expression levels of 3 averaged parental CD34 samples (same donor), plus and minus standard deviation (dotted green lines). (B) MA-plot comparing whole transcriptome of two iPS clones simultaneously derived by OKS-induced reprogramming of CD34+ cells from one donor. Refseq (black dots) and Repbase entries (red dots) are illustrated with the most dysregulated EREs (top) and KRAB-ZFPs (bottom) indicated.

**Fig. S4: HERV deregulation impacts on adjacent genes expression**

Two more examples of dysregulated HERVs and impact on neighboring gene. (A) *KLKB1* and an intronic HERVH on chromosome 4 and (B) *C9ORF129* with the upstream HERVH on chromosome 9. Left, expression level tracks and H3K9me3 and Kap1 binding in human ESC. Right, expression levels of ERE-gene pairs, with Spearman correlation calculated. (C) Comparative expression of indicated KRAB-ZFPs in parental CD34+ cells (average of 3 samples), in 6 iPSC clones simultaneously derived from their reprogramming, and in control H1 ES cells.

**Fig. S5: ERE expression after differentiation of iPS clones**

iPS clones from CD34 reprogramming were differentiated to embryoid bodies (EB) or commited to neural differentiation (ND). Expression of HERVH and HERVK families and individual ERE integrants near the genes PRODH and HHLA1 were quantified by qPCR. Relative expression levels are shown for iPS clones (orange columns), embryoid bodies obtained from each clone (grey, except hiPS2 for which we could not obtain EBs), and neural commitment (purple).

**SupplementaRY MATERIAL AND METHODS**

**Teratoma formation assay.** Immunodeficient NSG mice (NOD.Cg-*Prkdcscid Il2rgtm1Wjl*/SzJ, http://jaxmice.jax.org/strain/005557.html) were used for teratoma formation assay. iPS clones 2, 6, 14 and 43 were injected in three different mice and human ES cells (H1) were used as controls. 1x106 cells (100 µl volume, 50% matrigel) were injected subcutaneously and animals were observed twice a week for tumor growth. Tumor size was measured with a caliper and animals were sacrificed after 6 weeks or after development of tumors larger than 1 cm3. Tumors were then dissected out and subjected to histological analysis.

**Embyoid body formation. .** iPS clones were differentiated to embryoid bodies using Aggrewell plates (Stemcell technoloiges #27845) and Aggrewell medium (Stemcell technoloiges #05893) according to manufacturer’s recommendations.

**Neural differentiation.** iPS clones were committed to the neural lineage by growing for 10 days on matrigel in neuromedium containing DMEM F12, N2, penicillin/streptomycin, non essential amino acids and noggin 400ng/ml. Neural commitment was assessed by induction of the PAX6 gene by qPCR.

**Primer sequences.**

**ERE qPCR quantification**

**IAP:**

IAP 5'UTR F: CGGGTCGCGGTAATAAAGGT

IAP 5'UTR R: ACTCTCGTTCCCCAGCTGAA

**MusD:**

MusD F: GATTGGTGGAAGTTTAGCTAGCAT

MusD R: TAGCATTCTCATAAGCCAATTGCAT

**MERVL:**

MERVLPolrt_F: ATCTCCTGGCACCTGGTATG

MERVLPolrt_R; AGAAGAAGGCATTTGCCAGA

**Mouse L1:**

Line1 F: TTTGGGACACAATGAAAGCA

Line1 R: CTGCCGTCTACTCCTCTTGG

**SVA:**

O.SVA.1: CTCGTTCACTCAGTGCTCAATG

O.SVA.2: CTGGGAGGTGGAGGTTGTAG

**Human L1:**

L1.1: GAACGCCACAAAGATACTCC

L1.2: CTCTTCTGGCTTGTAGGGTTTCTG

**HERVK:**

HERVK.1: AGAGGAAGGAATGCCTCTTGCAG

HERVK.2: TTACAAAGCAGTATTGCTGCCCGC

**HERV14ci:**

HERVK14CI.5: CCATTGTGCTCCATTGGAAG

HERVK14CI.6: CCCTCTGTGCCGATTGAAAG

**HERVH:**

HERVH f1: TTGGTGCCTTGACTCGGATT

HERVH r1: GGATCC TTTTCACGGAGCAA

**ERE near HHLA1:**

HHLA_EREexpr_f2: ACCTGCCTTTGCTGGTGTGT

HHLA_EREexpr_r2: CCCTGATCACGCTTGATTTATTG

**ERE near PRODH:**

PRODH_EREexpr_f2: TTAGTCTGCAGGTGTACCCAACA

PRODH_EREexpr_r2: AAAACCGCCATCGTCATCAT

**Normalizing genes**

***Cox6a1*:**

Mm Cox 6a1 F: CTCTTCCACAACCCTCATGTGA

Mm Cox 6a1 R: GAG GCC AGG TTC TCT TTA CTC ATC

***Trfr*:**

Mm Trfr 1 F GGAATCCCAGCAGTTTCTTTTTG

Mm Trfr 1 R CAATGCCTCATAGGTATCCAATCTAG

***Gapdh*:**

Mm Gapdh F: TCCATGACAACTTTGGCATTG

Mm Gapdh R: CAGTCTTCTGGGTGGCAGTGA

***B2M*:**

HsB2Micro F: TGCTCGCGCTACTCTCTCTTT

HsB2Micro R: TCTGCTGGATGACGTGAGTAAAC

***TFRC*:**

TFRC F: CATTTGTGAGGGATCTGAACCA

TFRC R: CGAGCAGAATACAGCCACTGTAA

***PAX6*:**

O.PAX6.1F: CGGTTTCCTCCTTCACAT

O.PAX6.1R; ATCATAACTCCGCCCATT

**ChIP qPCR quantification**

ER_PRODH_3'_F1: GCCTCTCAGAGTGCTGGGATT

ER_PRODH_3'_R1: GCAGGGCATCATTCTTTCAAA

ER_PRODH_3'_F2: CCCAGTCATGGATTATTTTGAAAGA

ER_PRODH_3'_R2: CTCCCATCCAGCCGATCTC

ER_PRODH_5'_F1: GCTACCCTGAGCCAGCTGAT

ER_PRODH_5'_R1: AGGAGTTCAAGGCCACAGTGA

ER_PRODH_5'_F2: AAGGCTGGCCTGAAAGTCACT

ER_PRODH_5'_R2: CTGAGCCTAAGACCTGCTTCCTA

ER_HHLA1_3'_F1: TGCCTTATGGATACAACTAAATTTCATG

ER_HHLA1_3'_R1: CACCCAGGTGAAATAAACAGCTT

ER_HHLA1_3'_F2: CCATACCGGCTCATACAGATCTG

ER_HHLA1_3'_R2: GCTCCTGTTACCTCTAGGCTCACA

ER_HHLA1_5'_F1: AGAGGCCTGACACTAAAAACCAA

ER_HHLA1_5'_R1: TCTATGGGAGCCTGTTTTTCAAG

ER_HHLA1_5'_F2: GAGGGCTTAATTCAGAGGGAAATC

ER_HHLA1_5'_R2: TGAGCCCACTTCCTTCTTTTCT

HsOct4_prom_f1: CACCCTCTCAGCTCCTCAAATT

HsOct4_prom_r1: TGCTTATGGCTGTTGATGCATT

HsNanog_prom_f2: AAACTAAGGTAGGTGCTGAAAACAAGT

HsNanog_prom_r2: TTCCTCTTTCATTCACTCTGAGGTT

ZNF180 3' F: TGATGCACAATAAGTCGAGCA

ZNF180 3' R: TGCAGTCAATGTGGGAAGTC

ZNF420 3' F: GCGTTTAATCGTGGCTCACT

ZNF420 3' R: TGTGAATTCGCTCATGTTGA

EVX1 F: CTGGGTGTCTCCCTCTCTCA

EVX1 R: AAAGGAAACCCGCAGCTAAT

GAPDH F: CACCGTCAAGGCTGAGAACG

GAPDH R: ATACCCAAGGGAGCCACACC
